# Supplementary material for: Gene polymorphism associated with angiotensinogen (M235T), endothelial lipase (584C/T) and susceptibility to coronary artery disease: a meta-analysis
Source: Oxford University Press journal article supplement (doi:10.1042/bsr20201414), 2020-07-01
Supplement: bsr-2020-1414_supp.pdf [file bsr-2020-1414_supp.pdf]

Supplementary table 1 Quality assessment included in the study(NOS)

| First author  | Year | Case selection |   |   |   | Comparability<br>between groups |   | Exposure factor<br>measurement |               | NOS score |   |
|---------------|------|----------------|---|---|---|---------------------------------|---|--------------------------------|---------------|-----------|---|
|               |      | 1              | 2 | 3 | 4 | 5                               | 6 | Blind method                   | Response rate |           |   |
| Ko YL         | 1997 | *              | * | * | * | *                               | * | ?                              | *             | *         | 8 |
| Chen D        | 1998 | *              | * | * | * | *                               | * | ?                              | *             | *         | 8 |
| Sheu WH       | 1998 | *              | * | * | * | *                               | * | ?                              | *             | ?         | 7 |
| Xie Y         | 2001 | *              | * | * | * | *                               | * | ?                              | *             | ?         | 7 |
| Zhu TB        | 2002 | *              | * | * | * | *                               | * | ?                              | *             | *         | 8 |
| Gu WD         | 2003 | *              | * | * | * | *                               | * | ?                              | *             | *         | 8 |
| Zhu TN        | 2004 | *              | * | * | * | *                               | * | ?                              | *             | *         | 8 |
| Li L          | 2004 | *              | * | * | * | *                               | * | ?                              | *             | ?         | 7 |
| Ren J         | 2005 | *              | * | * | * | *                               | * | ?                              | *             | ?         | 7 |
| Yang JP       | 2013 | *              | * | * | * | *                               | * | ?                              | *             | ?         | 7 |
| Huang YZ      | 2013 | *              | * | * | * | *                               | * | ?                              | *             | ?         | 7 |
| Al-Hazzani    | 2014 | *              | * | * | * | *                               | * | ?                              | *             | *         | 8 |
| Bonfim a      | 2016 | *              | * | * | * | *                               | * | ?                              | *             | *         | 8 |
| Bonfim b      | 2016 | *              | * | * | * | *                               | * | ?                              | *             | *         | 8 |
| Khatami       | 2017 | *              | * | * | * | *                               | * | ?                              | *             | *         | 8 |
| Isordia-Salas | 2018 | *              | * | * | * | *                               | * | ?                              | *             | *         | 8 |
| Zhu M         | 2019 | *              | * | * | * | *                               | * | ?                              | *             | *         | 8 |
| Rimm          | 1992 | *              | * | * | * | *                               | * | ?                              | *             | *         | 8 |
| Colditz       | 1997 | *              | * | * | * | *                               | * | ?                              | *             | *         | 8 |
| Tjonneland    | 2007 | *              | * | * | * | *                               | * | ?                              | *             | *         | 8 |
| Zhu JC        | 2007 | *              | * | * | * | *                               | * | ?                              | *             | ?         | 7 |
| Tang NP       | 2008 | *              | * | * | * | *                               | * | ?                              | *             | *         | 8 |
| Zhang L       | 2009 | *              | * | * | * | *                               | * | ?                              | *             | ?         | 7 |
| Cai GJ        | 2014 | *              | * | * | * | *                               | * | ?                              | *             | *         | 8 |
| Xie L         | 2015 | *              | * | * | * | *                               | * | ?                              | *             | *         | 8 |
| Elnaggar      | 2018 | *              | * | * | * | *                               | * | ?                              | *             | *         | 8 |
| Solim         | 2018 | *              | * | * | * | *                               | * | ?                              | *             | *         | 8 |
| Shimizu       | 2007 | *              | * | * | * | *                               | * | ?                              | *             | *         | 8 |
| Vergeer       | 2010 | *              | * | * | * | *                               | * | ?                              | *             | *         | 8 |
| Toosi         | 2015 | *              | * | * | * | *                               | * | ?                              | *             | *         | 8 |

Note: \*:Yes;?:unclear;1:Case identification appropriate;2:Case representativeness;3:The source of the control clear;4:control group choosed properly;5:Controls the most important confounding factors;6:Control other confounding factors;7:same exposure determination method; NOS:Newcastle-Ottawa Scale
